# Supplementary material
Source: PubMed Central journal article supplement (PMC3706985)
Supplement: NIHMS486302-supplement-01.pdf [file NIHMS486302-supplement-01.pdf]

**Online Supplement**

**Table E1: Bivariable relationships between study variables and outcomes\***

| Panel A: Categorical Variables               | ER Visits |              | OS Prescription Fills |              |
|----------------------------------------------|-----------|--------------|-----------------------|--------------|
|                                              | % (n)     | p-value      | % (n)                 | p-value      |
| Sex:                                         |           | 0.36         |                       | <b>0.031</b> |
| Male [n=159]                                 | 7.6 (12)  |              | 36.5 (58)             |              |
| Female [n=409]                               | 10.0 (41) |              | 46.5 (190)            |              |
| Race/Ethnicity                               |           | 0.065        |                       | <b>0.006</b> |
| Non-Hispanic, White [n=424]                  | 8.0 (34)  |              | 40.3 (171)            |              |
| Non-Hispanic, Black/African American [n=144] | 13.2 (19) |              | 53.5 (77)             |              |
| Study Group**                                |           | 0.91         |                       | 0.90         |
| Treatment Group [n=272]                      | 9.2 (25)  |              | 43.4 (118)            |              |
| Control Group [n=296]                        | 9.5 (28)  |              | 43.9 (130)            |              |
| Antidepressant Prescription Fills†           |           | 0.069        |                       | 0.42         |
| No [n=442]                                   | 8.1 (36)  |              | 42.8 (189)            |              |
| Yes [n=126]                                  | 13.5 (17) |              | 46.8 (59)             |              |
| Psychotherapy Visits‡                        |           | 0.055        |                       | 0.75         |
| No [n=529]                                   | 8.7 (46)  |              | 43.5 (230)            |              |
| Yes [n=39]                                   | 18.0 (7)  |              | 46.2 (18)             |              |
| ACT Controlled§                              |           | <b>0.047</b> |                       | <b>0.005</b> |
| No [n=198]                                   | 12.6 (25) |              | 51.5 (102)            |              |
| Yes [n=359]                                  | 7.5 (27)  |              | 39.3 (141)            |              |

|                                           |                      |                |                      |                |
|-------------------------------------------|----------------------|----------------|----------------------|----------------|
| Depression at Baseline (Time 1)           |                      | 0.76           |                      | 0.12           |
| No [n=364]                                | 9.6 (35)             |                | 41.2 (150)           |                |
| Yes [n=204]                               | 8.8 (18)             |                | 48.0 (98)            |                |
| Depression at 15-month Follow-Up (Time 2) |                      | 0.088          |                      | 0.91           |
| No [n=381]                                | 7.9 (30)             |                | 43.8 (167)           |                |
| Yes [n=187]                               | 12.3 (23)            |                | 43.3 (81)            |                |
|                                           | <b>Mean (SD)</b>     |                | <b>Mean (SD)</b>     |                |
| <b>Panel B: Continuous Variables</b>      | <b>[n]</b>           | <b>p-value</b> | <b>[n]</b>           | <b>p-value</b> |
| Age                                       |                      | 0.47           |                      | 0.52           |
| No: Visits/Fills                          | 45.3 (9.1)<br>[515]  |                | 44.8 (9.8)<br>[320]  |                |
| Yes: Visits/Fills                         | 44.2 (9.9)<br>[53]   |                | 45.8 (8.4)<br>[248]  |                |
| ICS Adherence¶                            |                      | 0.90           |                      | 0.059          |
| No: Visits/Fills                          | 38.2 (39.5)<br>[506] |                | 36.2 (40.1)<br>[314] |                |
| Yes: Visits/Fills                         | 37.1 (37.7)<br>[52]  |                | 40.6 (38.1)<br>[244] |                |
| History of ER Visits¶¶                    |                      | <b>0.010</b>   |                      | 0.14           |
| No: Visits/Fills                          | 0.06 (0.29)<br>[575] |                | 0.06 (0.31)<br>[320] |                |
| Yes: Visits/Fills                         | 0.19 (0.52)<br>[53]  |                | 0.09 (0.34)<br>[248] |                |

|                                    |                      |       |                      |        |
|------------------------------------|----------------------|-------|----------------------|--------|
| History of OS Prescription Fills¶¶ |                      | 0.075 |                      | <0.001 |
| No: Visits/Fills                   | 0.71 (1.23)<br>[515] |       | 0.48 (0.92)<br>[320] |        |
| Yes: Visits/Fills                  | 1.13 (1.83)<br>[53]  |       | 1.10 (1.60)<br>[248] |        |

ER denotes emergency room; OS, oral steroid; SD, standard deviation;

\*Bivariable models comparing main study variables with dichotomous outcomes - ER visits and OS fills - separately in the 12-month period after the second survey administration point. Models with categorical variables (Panel A) use chi-square tests and models with continuous variables (Panel B) use wilcoxon two-sample tests.

\*\*Represents individuals who participated in the Adherence Feedback for Improving Respiratory Medication Use (AFFIRM) trial by group (treatment versus control).

†Any antidepressant medication prescription fills in a 3-month period corresponding to the second administration period (yes/no).

‡Any psychotherapy visit in a 3-month period corresponding to the second administration period (yes/no).

§Baseline ACT dichotomized such that scores  $\leq 19$  were considered uncontrolled asthma and scores  $> 19$  were considered controlled asthma.

|| Represents individuals who met criteria for depression, as measured using the Whooley 2-item case finding instrument. An answer of yes to either question is considered positive.

¶ Represents a 3-month measure of ICS use corresponding to the time of the follow-up survey.

¶¶ Represents the number of asthma-related events in the 12-month window before the date of the follow-up survey.

**Table E2: Depression measured over time as a predictor of asthma exacerbations\***

|                        | ER Visits         |                  | OS Prescription Fills |                  |
|------------------------|-------------------|------------------|-----------------------|------------------|
|                        | RR (95% CI)       | p-value          | RR (95% CI)           | p-value          |
| History of ER visits † | 2.78 (1.62, 4.76) | <b>&lt;0.001</b> | -                     | -                |
| History of OS fills‡   | -                 | -                | 1.46 (1.36, 1.56)     | <b>&lt;0.001</b> |
| Depression §           |                   |                  |                       |                  |
| Yes-No (ref.=No-No)    | 0.46 (0.16, 1.36) | 0.16             | 1.11 (0.82, 1.50)     | 0.50             |
| Yes-Yes (ref.=No-No)   | 1.41 (0.70, 2.83) | 0.34             | 1.20 (0.78, 1.86)     | 0.41             |
| No-Yes (ref.=No-No)    | 1.52 (0.53, 4.36) | 0.43             | 0.88 (0.57, 1.36)     | 0.57             |
| No-Yes (ref.=Yes-No)   | 3.30 (1.08, 9.96) | <b>0.035</b>     | 0.79 (0.54, 1.18)     | 0.25             |
| Yes-Yes (ref.=Yes-No)  | 3.04 (1.25, 7.41) | <b>0.014</b>     | 1.08 (0.71, 1.65)     | 0.71             |
| No-Yes (ref.=Yes-Yes)  | 1.08 (0.43, 2.74) | 0.86             | 0.73 (0.44, 1.21)     | 0.23             |

ER denotes emergency room; RR, relative risk; CI, confidence interval; ref.=reference

\*Negative binomial regression models predict ER visits and OS fills in the 12-month period after the second survey administration point. All models adjusted for age (continuous), race/ethnicity, sex, study group (intervention vs. control), asthma control (good at 80% vs. poor at baseline), and 3-month CMA for ICS (continuous measure of medication adherence for inhaled corticosteroids at follow-up).

†Continuous number of ER visits for asthma in the 12-month period prior to the second survey administration point. This variable was not included in the analysis for OS Prescription Fills, as there was a null relationship found between the two variables.

‡Continuous number of OS fills for asthma in the 12-month period prior to the second

---

survey administration point. This variable was not included in the analysis for ER visits, as there was a null relationship found between the two variables.

§ Depression measured by the Whooley et al. two-item depression case finding instrument at baseline and follow-up. A 'yes' answer indicates a positive response to either of the two questions. A yes-no response to the first and second surveys is set as the reference.

**Table E3: Depression treatment participation and asthma exacerbations among participants with depression and asthma\***

|                                     | ER Visits         |                  | OS Fills          |                 |
|-------------------------------------|-------------------|------------------|-------------------|-----------------|
|                                     | HR (95% CI)       | <i>p</i> -value  | HR (95% CI)       | <i>p</i> -value |
| Antidepressant prescription fills † | 2.09 (1.35, 3.25) | <b>&lt;0.001</b> | 1.09 (0.79, 1.49) | 0.61            |
| Psychotherapy visits ‡              | 2.07 (1.38, 3.22) | <b>&lt;0.001</b> | 0.96 (0.63, 1.48) | 0.85            |

ER denotes emergency room; OS, oral steroid; HR, hazard ratio; CI, confidence interval; ICS, inhaled corticosteroid medication fills

\*Modified, multiple endpoints, cox proportional hazards models predict ER visit and OS fill event occurrences following the second survey administration point. All models adjusted for age (continuous), race/ethnicity, sex, study group (intervention vs. control), asthma control (good at 80% vs. poor at baseline), and 3-month CMA for ICS (continuous measure of medication adherence for inhaled corticosteroids at follow-up).

†Any antidepressant medication prescription fills in a 3-month period corresponding to the second administration period (yes/no).

‡ Any psychotherapy visit in a 3-month period corresponding to the second administration period (yes/no).
